# Supplementary material for: Network-driven cancer cell avatars for combination discovery and biomarker identification for DNA damage response inhibitors
Source: PubMed Central journal article supplement (PMC11192759; doi:10.1038/s41540-024-00394-w), 2024-06-21
Supplement: 41540_2024_394_MOESM1_ESM.pdf [file 41540_2024_394_MOESM1_ESM.pdf]

## Supplementary Material

### Network-driven cancer cell avatars for combination discovery and biomarker identification for DNA Damage Repair inhibitors

Orsolya Papp<sup>1#</sup>, Viktória Jordán<sup>1#</sup>, Szabolcs Hetey<sup>1</sup>, Róbert Balázs<sup>1</sup>, Valér Kaszás<sup>1</sup>, Árpád Bartha<sup>1</sup>, Nóra N. Ordasi<sup>1</sup>, Sebestyén Kamp<sup>1</sup>, Bálint Farkas<sup>1</sup>, Jerome Mettetal<sup>2</sup>, Jonathan R. Dry<sup>3</sup>, Duncan Young<sup>4</sup>, Ben Sidders<sup>5</sup>, Krishna C. Bulusu<sup>5\*</sup>, Daniel V. Veres<sup>1\*</sup>

<sup>1</sup> *Turbine Simulated Cell Technologies, Budapest, Hungary*

<sup>2</sup> *Oncology Bioscience, Research and Early Development, Oncology R&D, AstraZeneca, Waltham, US*

<sup>3</sup> *Early Data Science, Oncology Data Science, Oncology R&D, AstraZeneca, Waltham, US*

<sup>4</sup> *Search and Evaluation, Oncology R&D, AstraZeneca, Cambridge, UK*

<sup>5</sup> *Early Data Science, Oncology Data Science, Oncology R&D, AstraZeneca, Cambridge, UK*

# These authors contributed equally: Orsolya Papp, Viktoria Jordan.

\* These authors jointly supervised this work: Daniel V. Veres, Krishna C. Bulusu.

\* Corresponding author: D.V.V. (daniel.veres@turbine.ai)

Corresponding authors' address:

Turbine Simulated Cell Technologies

H-1083 Budapest, Szigony u. 26-32

Phone: +36-20-313-0213

## Table of contents

|                                                                                                                                                                                       |           |
|---------------------------------------------------------------------------------------------------------------------------------------------------------------------------------------|-----------|
| <b>Table of contents</b> .....                                                                                                                                                        | <b>2</b>  |
| <b>Supplementary Discussion</b> .....                                                                                                                                                 | <b>4</b>  |
| <b>Supplementary Discussion: PRKDCi:NFKBi combination synergy and its monotherapy and combination- specific biomarkers</b> .....                                                      | <b>4</b>  |
| Monotherapy biomarkers.....                                                                                                                                                           | 4         |
| Combination specific biomarkers .....                                                                                                                                                 | 6         |
| Discussion of combination specific biomarkers .....                                                                                                                                   | 8         |
| <b>Supplementary Methods</b> .....                                                                                                                                                    | <b>10</b> |
| <b>Supplementary Methods 1: Cell line and drug properties</b> .....                                                                                                                   | <b>10</b> |
| Cell line datasets .....                                                                                                                                                              | 10        |
| Compound databases .....                                                                                                                                                              | 10        |
| Determination of genetic variants .....                                                                                                                                               | 10        |
| <b>Supplementary Methods 2: Description of <i>in silico</i> simulation types</b> .....                                                                                                | <b>11</b> |
| Native simulation .....                                                                                                                                                               | 11        |
| Monotherapy response screening and calculation of <i>in silico</i> IC50 values.....                                                                                                   | 11        |
| Combination therapy screen.....                                                                                                                                                       | 12        |
| Biomarker screen .....                                                                                                                                                                | 14        |
| <b>Supplementary Methods 3: Analysis of features governing <i>in silico</i> predictivity</b> .....                                                                                    | <b>17</b> |
| Identification of features important to predict synergistic combinations.....                                                                                                         | 17        |
| Identification of differences between correctly and wrongly predicted synergies based on monotherapeutic features.....                                                                | 21        |
| <b>Supplementary Methods 4: Machine learning benchmark framework for validating the predictive performance of the Simulated Cell</b> .....                                            | <b>25</b> |
| <b>Supplementary Figures</b> .....                                                                                                                                                    | <b>27</b> |
| <b>Supplementary Figure 3: Comparison of <i>in vitro</i> dose responses from different sources across the DREAM challenge cell line set</b> .....                                     | <b>27</b> |
| <b>Supplementary Figure 4: ROC curves of monotherapy simulations for compounds targeting DDR or non-DDR MoA categories</b> .....                                                      | <b>28</b> |
| <b>Supplementary Figure 5: Examples of different combination grid quality categories</b> .....                                                                                        | <b>29</b> |
| <b>Supplementary Figure 6: Discretization of synergy scores with K-means clustering</b> .....                                                                                         | <b>30</b> |
| <b>Supplementary Figure 7: Grouped indication specific landscape of DDR:DDR combinations on combination modified killrates and overall synergy</b> .....                              | <b>31</b> |
| <b>Supplementary Figure 8: Performance analysis of combination synergy benchmark</b> .....                                                                                            | <b>32</b> |
| <b>Supplementary Figure 9: Tree-based feature importance of association between monotherapy related features and combination prediction accuracy with a Random Forest model</b> ..... | <b>33</b> |
| <b>Supplementary Figure 10: Investigation of relevant features impacting synergy as a target feature using SHapley Additive exPlanations (SHAP)</b> .....                             | <b>34</b> |

|                                                                                                                                                                                                                                         |           |
|-----------------------------------------------------------------------------------------------------------------------------------------------------------------------------------------------------------------------------------------|-----------|
| <b>Supplementary Figure 11: Determining features of predicting combination synergy and their positive and negative coefficients from logistic regression model based on 10-fold leave drug combinations out cross- validation .....</b> | <b>34</b> |
| <b>Supplementary Figure 12: Comparison of the monotherapy response and combination synergy prediction performance of the Simulated Cell and machine learning models in case of different train-test splits .....</b>                    | <b>36</b> |
| <b>Supplementary Data .....</b>                                                                                                                                                                                                         | <b>37</b> |
| <b>Supplementary Data 1: <i>In silico</i> vs <i>in vitro</i> monotherapy measurements with respective cell line and compound annotation .....</b>                                                                                       | <b>37</b> |
| <b>Supplementary Data 2: Combination measurement metrics .....</b>                                                                                                                                                                      | <b>37</b> |
| <b>Supplementary Data 3: Monotherapy biomarkers .....</b>                                                                                                                                                                               | <b>37</b> |
| <b>Supplementary Data 4: Combination biomarkers for PARPi:ATMi along with PRKDCi:NFKBi .....</b>                                                                                                                                        | <b>38</b> |
| <b>Supplementary Data 5: The estimated patient population size for Olaparib:ATMi combination and the prevalence of the significantly strong synergy shifter biomarkers specific for the combination .....</b>                           | <b>38</b> |
| <b>Supplementary References .....</b>                                                                                                                                                                                                   | <b>40</b> |

## Supplementary Discussion

### Supplementary Discussion: PRKDCi:NFKBi combination synergy and its monotherapy and combination- specific biomarkers

We have selected two drug combinations, Olaparib:AZ13535704 (AZD0156, ATMi) and AZ13150560:AZ12879988 (PRKDCi:NFKBi), as examples to generate a biomarker hypothesis through a signaling-level understanding of how combination benefit emerges behind the observed synergy and viability score changes.

There is not much known in the literature nor in clinical trials about how a PRKDCi:NFKBi drug pair would potentiate or antagonize each other's effectivity on modulating cell viability. Our results revealed this combination of mechanisms being highly synergistic and non-synergistic in different indications, therefore both synergy- increasing and decreasing biomarkers could be identified in an indication- specific manner.

#### Monotherapy biomarkers

We have predicted the sensitizing effect of 34 PRKDCi- specific alterations in 12 cell lines, while 14 alterations were observed as viability increasing, resistance causing biomarkers for this compound. In 12 cell lines, in total 81 perturbations were observed as sensitivity markers, while 11 markers were considered to make 8 cell lines resistant to the NFKBi (Supplementary Figure 1).

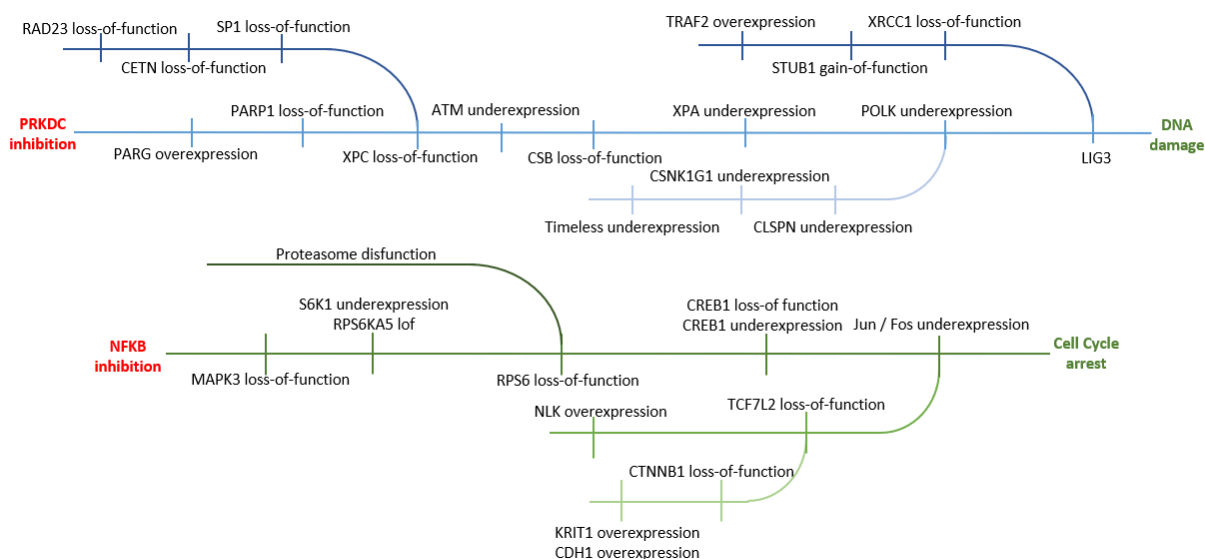

### **Supplementary Figure 1. Signaling topology of detected alterations for PRKDCi and NFKBi can be followed based on the signal propagation in the Simulated Cell network**

Visualization of the relationship between the predicted monotherapy sensitivity biomarkers. It represents how they promote and reinforce the cytotoxic effect of both drugs. Loss of the BER or NER damage repair pathway raises the DNA damage load, while many of the mitotic pathway errors lead to cell cycle arrest. The connection between the biomarkers is indirect and shows signal propagation from the drug target to the outcome only.

Inhibition of the NF $\kappa$ B pathway via I $\kappa$ BKB with AZ12879988 will result in the disruption of transcription of a variety of genes working towards cell survival. Our screens showed an array of sensitivity biomarkers upon NF $\kappa$ B inhibition, mostly via inhibiting regulators of protein synthesis and upstream regulators that of, such as RPS6 or its activator kinase RPS6KB1. Parallel to the lack of the synthesis of de novo proteins, a dysfunctional proteasome will push the cell into a stressful state called Unfolded Protein Response (UPR) resulting in activated apoptosis via the accumulated misfolded proteins during accelerated protein synthesis in cancer. We also predicted the dependency of the transcription factor AP-1 (JUN) and its binding partner c-FOS (FOS) with the consequence of an abrogated cell cycle by lost transcription of its proteins. Our screens also showed some of the upstream regulators of JUN and FOS as important biomarkers by epigenetic regulation of its presence via BARD1 or KAT7. Epigenetic regulation also played a role via the WNT pathway's control of JUN expression. We showed loss-of-function of Catenin  $\beta$ -1 (CTNNB), or the overexpression of its negative regulators such as KRIT1 or CDH1 as sensitivity biomarkers. The same effect was measured downstream of WNT signaling with loss-of-function mutation of TCF7L2 or inhibition of it via the overexpression of its upstream regulator NLK as sensitivity biomarkers in various cell lines.

Abruption of a double-strand break repair pathway such as the non-homologous end joining via inhibition of PRKDC could be the breakdown of the last resort for cells harboring SSB repair-related mutations. Disruption of the BER pathway via loss-of-function mutation of PARP1 protein or inhibiting it via the constant activation of its counteracting protein PARG represent such cases. Another case in our screen was the loss-of-function mutation or underexpression of CSB and underexpression of XPA inhibiting cells to incise problematic nucleotides inserted during

synthesis, while underexpression of any subunit of POLK complex or losing a member of the XPC complex will cause issues during the filling of the incised gaps.

Our screens also showed that underexpression of CLSPN (claspin) or loss-of-function mutation of its regulator CSNK1G1 will inhibit POLK to fulfill its role. Upon inhibition by any of the drugs losing anti-apoptotic proteins by downregulation will act in favor of the toxic mechanism of the given drug, therefore loss-of-function mutation of BCLXL or gain-of-function mutation of upstream negative regulators of BCLXL, such as RXRA, RXRB or HINT1 ended up as sensitivity biomarkers in our screens. Similar to the overall sensitivity of the apoptotic pathway proteins, activating mutation in the RAS-RAF axis such as the RAS-related protein RALB or its GTPase activators RALGAPA1,2 and RALGAPB will end up as resistance markers. Similarity between the importance of apoptotic regulation shows the potential of this combination therapy option.

### Combination specific biomarkers

There were no biomarker candidates mentioned in the DREAM challenge being specific for this MoA combination. After a systematic prescreen for those protein alterations which are causing a combination specific effect (Supplementary Methods 1), we selected 166 alterations consisting of 118 proteins or protein-complexes for the PRKDCi:NFKBi combination to analyze their effect on synergy and cell viability. We have further investigated only those combination-cell line pairs, where the dose of the individual combination members at the maximum synergy score was lower compared to the IC50 value of the respective monotherapies. Furthermore, we also excluded those biomarker-combination-cell line triplets, where a significant cell survival decrease was observed but the synergy shifted to a non-synergistic state, as these cases are suspected model artefacts.

The systematic biomarker prescreen confirmed that several pathways and their members can be relevant regarding shifting both cell viability and synergy (e.g. AKT, JAK-STAT, MAPK, p38-JNK) in the case of this combination. Overexpression of STAT3, JUN, and FOS increased both synergy and cell killing relative to non-perturbed cell lines. Although the sensitizing effect strength of JUN was statistically significant, its synergy increasing role is considered highly context specific, since JUN itself is a transcriptional factor bearing context specific functions. Similarly, the under-expression of STAT3 ( $p=1.78e-8$ ), overexpression of PPP2CA ( $p=2.34e-8$ ), or inactivating mutations in ATM or MID1 ( $p=1.28e-6$  and  $2.34e-5$ ) were resistance biomarker, since

the cell's killrate were lowered by them, thus made the cells less vulnerable to cell death. Synergy was also decreased when their effects were compared to wild-type cell lines. We also observed loss-of-function alterations of members of the mTOR signaling near to the mTOR-apoptosis crosstalk (mTORC2 complex and its complex members, PROTOR and RICTOR) with synergy decreasing effects (Supplementary Figure 2).

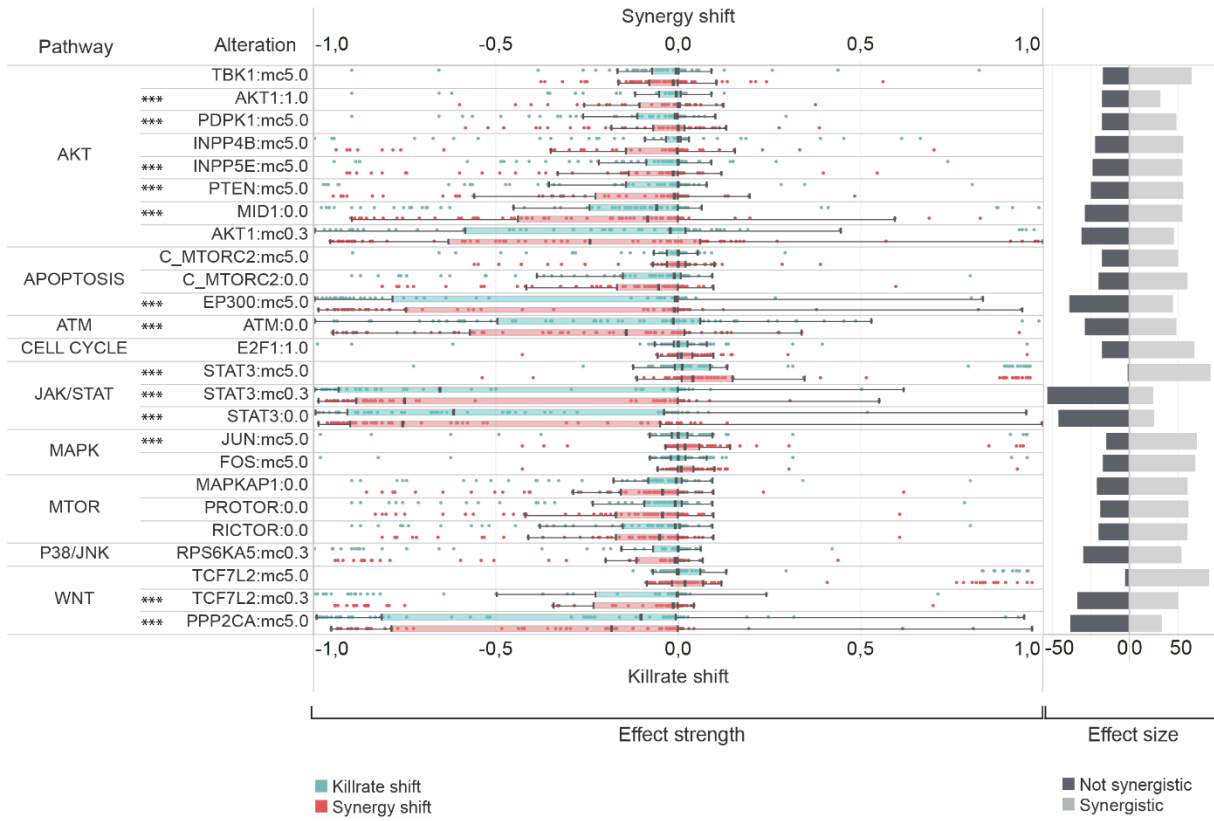

**Supplementary Figure 2. Effect strength and effect size of combination specific biomarkers for the PRKDCi:NFKBi combination.**

Figure represents the statistically significant ( $p < 0.001$ ) shift of killrate and synergy influencing biomarkers in cell lines. Horizontal bars demonstrate the sample size for each biomarkers, while the distribution of effect strength components (killrate shift and synergy shift) are represented in boxplots. Abbreviation: \*\*\*  $p \leq 0,001$  (rest of the visualized biomarkers statistical significance's is  $p \leq 0,05$ , 0.0 – loss-of-function, 1.0 – gain-of-function, mc5.0 – overexpression, mc0.3- underexpression. “C” prefixes represent protein complexes in the network.

## Discussion of combination specific biomarkers

We observed that this combination has an indication specific synergy pattern. Unfortunately, as a novel combination prediction, there were no experimental synergy scores available for comparison, and the literature evidence is also very limited. PRKDC (or DNA-PK) is a DNA-dependent protein kinase with a key role in repairing double-stranded DNA breaks, caused by DNA-damaging agents through non-homologous end joining (NHEJ). PRKDC is constituted of catalytic subunits (DNA-PKcs) and Ku70/80 DNA-binding subunits <sup>1</sup>, and phosphorylates proteins like transcription factors, RNA polymerases, p53, or Ku70/Ku80 (XRCC6/5) <sup>2</sup>.

Studies reported that in inflammatory diseases PRKDC is required for the expression of nuclear factor  $\kappa$ B (NF $\kappa$ B) target genes that are downstream of TNF- $\alpha$  <sup>3</sup>. Since inflammation is an important hallmark of especially metastatic cancer progression <sup>4,5</sup>, the interplay between PRKDC, NF $\kappa$ B, TNF- $\alpha$ , and interleukins could be a relevant approach for cancer cells in modifying their external microenvironment to increase the possibility of cell survival <sup>4,6</sup>. Therefore, understanding molecular alterations affecting synergy could be a viable approach to identifying sensitive cell populations to this combination.

Based on our biomarker screen STAT3 and JUN overexpression are potentially relevant biomarkers of combination sensitivity. The role of STAT3 and JUN overactivation in connection with the NF $\kappa$ B signaling is controversial in the literature, described either as an oncogenic or as a tumor suppressor, leading to a context dependent effect on cell survival <sup>7,8</sup>. In the Simulated Cell model used in this study, overexpression of STAT3 and JUN significantly increased synergy and increased the cell killing effect of this combination in some cells. On the contrary, both the inactivation and under-expression of STAT3 caused the opposite effect in the majority of the cell lines, leading to decreased synergy and cell killing. Therefore, based on our modeling, STAT3 is a strong hypothesis in influencing synergy between these two compounds despite the fact that the effect of STAT signaling is controversial. On one hand, it has the ability to stimulate cell proliferation by activating CCND1. On the other hand, it can elevate the risk of aneuploidy, which can be the trigger point for the cell to start its mechanism of delayed mitosis-linked cell death. STAT3 can also activate anti-apoptotic proteins as well, like MCL1, BCL2, and BIRC5. Thus, whichever scenario is about to happen it depends on the downstream members of STAT signaling and not on STAT3 itself.



A similar effect was observed after the inhibitory perturbation of NHEJ cross-talk pathway members, such as ATM or PPP2CA and TCF7L2 from the WNT pathway, resulted in weaker combination synergy. PPP2CA is an element of the PPP-family phosphatases. They regulate proteins by dephosphorylation included in the cell cycle, DDR, and several kinetochore kinases<sup>9,10</sup>. TCF7L2 modification is known to have a negative effect on cell proliferation through the regulation of WNT. Disruption of beta-catenin/TCF7L2 assembly's activity in colorectal carcinoma cells induces a rapid G1 arrest and blocks a genetic program that is physiologically active in the proliferative compartment of colon crypts, which is consistent with our results, showing that TCF7L2 under-expression has cell survival decreasing effect, beside its synergy lowering power<sup>11</sup>.

# Supplementary Methods

## Supplementary Methods 1: Cell line and drug properties

### Cell line datasets

97 cell lines were derived mainly from tumors of the breast (N = 27), lung (N = 27), bladder (N = 12) skin (N=9), and some other both primary and metastatic sites (N=22). Information about cell line characteristics were collected from the following databases: Expasy – Cellosaurus database (SIB Swiss Institute of Bioinformatics), ATCC, DSMZ (Leibniz Institute) (Supplementary Data 1).

### Compound databases

Screening for synergistic combination identification included 58 compounds covering a broad spectrum of mechanism of action groups, from which 12 were acting on DDR as the main drugs. Out of the other paired combination drugs, 18 targeted receptor and non-receptor tyrosine kinases (TK/RTKs), 14 targeted some elements of the PI3K-AKT-mTOR signaling, and 4 was for inhibiting apoptosis and ERK. The remaining drugs targeted pathways, such as JAK-STAT, or NFkB (Supplementary Data 1).

Benchmarking our *in silico* predictions requires reliable and commercially accessible sources of pharmacokinetic and pharmacodynamic data. Therefore, we collected information on compound target profiles using ChEMBL and cellular response for compounds from databases such as Cancer Cell Line Encyclopedia, Cancer Therapeutics Response Portal, FIMM, GCSI, Genomics of Drug Sensitivity in Cancer, Oncolines, PharmacODB, and we also used the available DREAM *in vitro* data (Supplementary Data 1).

### Determination of genetic variants

For the genetic variant annotations, the Ensembl Variant Effect Predictor (VEP) was used with the parameters below, where `input_file` is a VCF format and the `output_file` is the standard output of the tool.

```
Vep -af -af_1kg -af_esp -af_gnomad -appris -biotype -canonical -ccds -check_existing -distance 5000 -domains -hgvs -numbers -plugin dbNSFP, dbNSFP.gz, codon_degeneracy,
```

*MetaSVM\_score, MetaSVM\_rankscore, MetaSVM\_pred, MetaLR\_score, MetaLR\_rankscore, MetaLR\_pred, Reliability\_index –polyphen b –protein –pubmed –regulatory –sift b –species homo\_sapiens –symbol –tsl –11niport –cache –input input\_file –output output\_file*

## **Supplementary Methods 2: Description of *in silico* simulation types**

All descriptions below are applicable to Model version 4 of the Simulated Cell, released in 2019 Q3.

### **Native simulation**

To generate a cell population, consisting of 100 individuals cells from a single simulated cell, minor random perturbations are added to the mutational input layer of the simulation as a representation of both genotypic variance and therefore phenotypic heterogeneity inside the cell population. Perturbations are affecting the activity and concentration parameters of the nodes. Cell line specific phenotypic behavior was measured at the end of the simulation by aggregating the corresponding cell fate scores, such as cell cycle and cell death of the 100 attractors in the virtual population. We interpret our results as population based values. Thresholds for the combination of cell fate scores define the viability verdict of the cell population. If the cell population's viability score is above 0.6, we label it as alive. In the case of dead cell lines, the same score is under 0.4. Marginal scores between these two cut- off values representing cells with unknown behavior.

### **Monotherapy response screening and calculation of *in silico* IC50 values**

The setup of cell line's to match their native behavior is followed by the calibration of their drug response to match their *in vitro* counterparts accurately. Modifying the parameters of a node and its input edge weight makes it less or more dependent on the upstream regulator node. Monotherapy response measurement is based on the ratio of alive and dead cells contained in the virtual cell population, therefore normalized survival and cell death scores are calculated. The overall survival (S) of cell lines and killrate of a given dose of drugs are calculated with the following equation (1):

$$S = \frac{\text{relative cell cycle index}}{1 - \text{relative apoptosis index}}$$

$$\text{Killrate} = 1 - S$$

We retrieve the final IC50 value by fitting a three-parameter Hill function on the results. The point on the dose axis where the fitted curve reaches a killrate of 0.5 is the *in silico* IC50 value for the tested drug on the tested cell line.

## Combination therapy screen

In case of resistance or high toxicity for a specific drug, combination therapy is applied with at least two, potentially synergizing drugs. To find out which drugs would benefit patients the most and how they affect the *in silico* cells, we created the combination screen where two sets of drugs are tested on the same cell line with either a symmetric or asymmetric dose grid. Every cell line - combination pair is tested in a full dose grid, and the Bliss synergy score is calculated for all points of the grid.

### Processing raw data of combination synergy

Let  $K_a$  and  $K_b$  denote the proportions of cancer cells that died following drug treatment a and b, respectively, where  $\{K_a, K_b \in \mathbb{R} \mid 0 \leq K_a, K_b \leq 1\}$ . The model states that if drug a and b acts independently the predicted combination effect of the two drugs  $\hat{K}_{ab}$  can be calculated as (2):

$$\hat{K}_{ab} = K_a + K_b - K_a K_b$$

Let  $K_{ab}$  represent the observed combination effect of drug a and b where  $\{K_{ab}: 0 \leq K_{ab} \leq 1\}$ , then “excess over Bliss” namely Bliss score  $BS$  can be written as (3):

$$BS = K_{ab} - \hat{K}_{ab}, \{BS: -1 \leq BS \leq 1\}$$

where  $BS > 0$  indicates synergy and  $BS < 0$  indicates antagonism.

*Bliss max definition:*

*Bliss max* is the maximum over all of the Bliss scores in a combinational grid. Let (4)

$$v = \{v_i \in \mathbb{R}_{>0}, i = 1, \dots, n_a\}$$

$$u = \{u_i \in \mathbb{R}_{>0}, i = 1, \dots, n_b\}$$

denote the sets of doses applied to the cell as combinations from drug a and b, then the Cartesian product  $v \times u$  is the set of all ordered dose pairs from drug a and b. Let (5)

$$bm = (bm_1, \dots, bm_{n_a \times n_b})$$

denote the vector of Bliss scores where each element  $b_i \in bm$  is the Bliss score of the corresponding dose pair of  $v \times u$ , then “Bliss max” is the maximal value of vector bm (6):

$$Bliss\ max = \max bm_i, i = 1, \dots, n_a \times n_b$$

Taken the Bliss scores in a subgrid of the combinational grid where the subgrid is determined by the monotherapy IC50 values of the two compounds *Bliss max ic50* is the maximum Bliss score over this subgrid. In a given combinational grid *Maxdose* determines which dose pair of drug A and B have the maximum Bliss score of the IC50 subgrid and *Bliss ic50 killrate* is the killrate of drug combination at *Maxdose*.

Let  $IC50_a$  and  $IC50_b$  represent the half maximal inhibitory concentration of drug a and drug b respectively and A denotes the following subset of  $v \times u$  (7):

$$A = \{(n, m): (n, m) \in v \times u, n < IC50_a, m < IC50_b\}$$

Let  $bm_{ic50}$  denotes the vector of Bliss scores where each element  $bm_{ic50}(i) \in bm_{ic50}$  is the Bliss score of the corresponding dose pair of A, in this case, “Bliss max ic50” is defined by (8)

$$Bliss\ max\ ic50 = \max bm_{ic50}(i) \ i = 1, \dots, n$$

and *Maxdose* is the corresponding ordered dose pair of Bliss max ic50 from set A and *Bliss ic50 killrate* is the observed killrate of the drug combination at *Maxdose*.

## Quality control of raw combination results

Cell line specific combination grids went through a quality control process in which we checked the combinational grids for non-monotone dose response issues focusing on the subgrid area. This area is determined by the monotherapy IC50 values of the two compounds. Combination grids where the normalized survival values were not decreased according to increasing drug doses were judged individually and distinguished into the following categories:

- (i) Where normalized survival values varied by a minimum of 0,2 in the case of both compounds specifically on the subgrid area, the combination grid was considered to be not reliable and discarded from further analysis.
- (ii) Combinations where the same phenomenon could be observed, but above the subgrid area, were labelled as uncertain.
- (iii) In the case of observing an inverse association between increasing drug doses and cell viability, the combinations were considered to be reliable.

We proceeded to further analysis only with combinations tagged as uncertain and reliable. To determine cut-off values to distinguish between synergistic and non-synergistic combinations, we applied a K-means clustering- based algorithmic method. A similar approach has been already used in the literature to discretize gene expression data <sup>12</sup> (Supplementary Figure 6).

## Biomarker screen

The monotherapy response screen can be supplemented with extrinsic, artificial modifications of node activity and concentration parameters. This simulation type examines the power of the added alterations on shifting of monotherapy IC50 values. Inactivating (loss-of-function) mutations result in the possible decrease of the maximum activity of a protein to zero. Activating mutations (gain-of-function) constitutively activate a protein by increasing the possible minimum activity of a given protein to one. Protein abundances in the model are between 0 and 3, with most values being in the range of 0-1. An average 0.6 fold-change value reaches the potential maximum when multiplied by 5, while the same value goes to 0.2 (which does not completely turn the protein off, but already significantly impacts its ability to pass signals downstream) when multiplied by 0.3. Therefore, to generate overexpression or underexpression in the network, the actual concentration parameter of a given node is multiplied by 5 or 0.3 in every time-step, respectively. A monotherapy

specific biomarker is defined as the alteration of a specific protein which results in the IC50 shift of a tested drug as monotherapy, whereas a combination specific biomarker is an alteration that modifies the synergy of a combination therapy but failed to cause a shift in the monotherapy response.

#### Systematic prescreen for verdict changing biomarkers

The systematic prescreen was performed on 13 cell line models for AZ13150560:AZ12879988 combination and on 6 cell line models for Olaparib:AZ13535704 combination. Both sample sets were chosen to represent both synergistic and not synergistic combination-cell line pairs, to make the detection of biomarkers possible with synergy increasing and decreasing character. The prescreen searched for verdict changer molecular alterations that shifted the treated simulated cell's viability verdict status from alive to dead or vice versa, for sensitivity or resistance biomarkers, respectively. The prescreen systematically simulated the effect of loss-of-function, gain-of-function, underexpression, and overexpression of each node in the network while adding a single compound or compound combination effect to the simulation on doses manually curated for all cell lines. The doses were defined to have the *in silico* cell's viability clearly in the alive or dead verdict and to be in the most synergistic dose-pair if that coupled with decreased viability, the general concept during manual dose selection is to define doses that are 3-times higher or lower than the *in silico* cell lines IC50s.

Combination specific verdict changing alterations were selected if they shifted the viability on the specific cell lines only by adding the compound combination and did not shift the viability under monotherapy. For the AZ13150560:AZ12879988 combination, we further narrowed down the combination specific verdict changing alterations by selecting those for further detailed screening that are members of mTOR (TOR signaling), AKT (3-phosphoinositide-dependent protein kinase activity), JAK-STAT (receptor signaling pathway via JAK-STAT), PLCG (phospholipase C activity), TGF $\beta$  (transforming growth factor beta receptor signaling pathway), TNF (tumor necrosis factor-mediated signaling pathway), p38-JNK (stress-activated MAPK cascade), NHEJ (double-strand break repair via nonhomologous end joining), NF $\kappa$ B (I-kappaB kinase/NF-kappaB signaling), and apoptosis pathways based on our network annotation. These steps resulted in 41 alterations (8 sensitivity and 33 resistance biomarker candidates) for Olaparib:AZ13535704, and 166 alterations for AZ13150560:AZ12879988 (120 sensitivity and 46 resistance biomarker candidates) to proceed with for the detailed screening.

### Screen for combination specific synergy shifting biomarkers

In order to identify synergy-related biomarkers we compared the combined drug efficacy with and without added extrinsic mutations (henceforth *nomut* and *mut*, respectively). Two of the main metrics were *Bliss max ic50 nomut* and *Bliss max ic50 mut* which are the Bliss max ic50 values of the unmutated and mutated counterpart of a combination drug experiment. Comparison of these is an indicator of the mutation effect on the synergistic behavior of the drug combination.

Besides the specific synergy metrics, we also examined the killrates of the combination drugs, namely *Bliss ic50 killrate nomut* and *Bliss ic50 killrate mut* which are the *Bliss ic50 killrate* of the unmutated and mutated counterpart of drug combination.



## **Supplementary Methods 3: Analysis of features governing *in silico* predictivity**

The goal of the analysis was to create a model which captures the association between the characteristics of cell lines and drugs and the predicted synergy by our network. The used model should be interpretable hence the aim of this exploration was “inference” focused. The main idea was to use features of cell lines/drugs which were used as input data layer for the Simulated Cell network.

### Identification of features important to predict synergistic combinations

#### **The used datasets included:**

- Output of the post-processed combination results, which aggregates the dose grids into single, relevant metrics (Supplementary Data 2)
- Binarized Bliss\_max\_IC50 values were used as a measure of synergy.  
Thresholds: > 0.25 for synergistic, < 0.25 non-synergistic (Supplementary Figure 6)
- 59947 unique cell line-combination drug pair described with max, average Bliss scores and other features (Supplementary Data 4)
- 97 cell lines, 684 drug combinations (Supplementary Data 1)

#### **Input features**

##### 1. Monotherapy- related features

- a. Modelling feasibility (Supplementary Data 1)
- b. Fold accuracy (considering AZ in vitro results as the gold standard).  
When there was no cell line-drug match with any DREAM results, we replaced the missing values with the average IC50 value of the drug in all other cell lines.
- c. Target number in the signaling network and not in the signaling network, with various threshold values (100, 1000, 10000 nmols)
- d. Two kinds of mechanism of action (MoA) categories (Supplementary Data 1)
- e. Monotherapy cell line coverage of the different drugs (Supplementary Data 1)
- f. Number of common targets in the signaling network
- g. Number of common targets in total

2. Compound target related features
  - a. Median binding affinity values of proteins included in the signaling network
3. Mutation readiness
  - a. All unique included proteins with their corresponding encoded value (0: no mutation at this gene;, 1: gain-of-function mutation;, 2: loss-of-function mutation). (Described in Methods)
4. Fold change data
  - a. Fold change value of the genes in the network (Described in Methods)

### **Target feature**

- Binarized Bliss\_max\_IC50 values were used as a measure of synergy.  
Thresholds: > 0.25 for synergistic, < 0.25 non-synergistic (Supplementary Figure 6)  
Categorical transformation was needed due to the result of comparison with DREAM's *in vitro* results.

### **The created dataset included:**

- 20 monotherapy related features
- 262 compound target features
- 1681 fold change features
- 534 mutation readiness features

As we have high-dimensional input data, feature selection methods were used to reduce the dimensionality of the dataset, and an embedded method was applied which both executes feature selection and model fitting. Logistic regression was used with elastic net-based penalty to shrink coefficients of irrelevant features towards zero. In order to evaluate the model properly, we implemented several cross-validation schemes described by Preuer et al. <sup>13</sup>.

Evaluation of new drug combinations, new drugs, or new cell lines which the model hasn't seen before shows a much more realistic measure of the generalization capabilities of the model than random splits. In order to properly evaluate the generalization capabilities of the model we used the same "leave drug combination out" cross-validation method as Preuer et al. Hyperparameter optimization was used to choose the best- performing elastic-net mixing parameter and inverse regularization strength parameter (Supplementary Table 1).

| <b>Parameter set (C, I1 ratio)</b> | <b>Average weighted F-1 score</b> |
|------------------------------------|-----------------------------------|
| (0.001, 0.1)                       | 0.7955                            |
| (0.001, 0.5)                       | 0.7342                            |
| (0.001, 1.0)                       | 0.6825                            |
| (0.01, 0.1)                        | 0.8353                            |
| <b>(0.01, 0.5)</b>                 | <b>0.8368</b>                     |
| (0.01, 1.0)                        | 0.8155                            |
| (0.1, 0.1)                         | 0.8174                            |
| (0.1, 0.5)                         | 0.8206                            |
| (0.1, 1.0)                         | 0.8100                            |
| (1, 0.1)                           | 0.7860                            |
| (1, 0.5)                           | 0.7884                            |
| (1, 1.0)                           | 0.7758                            |

**Supplementary Table 1.**

**10-fold "leave drug combinations out" cross- validation result of different hyperparameters.**

The first column contains hyperparameters (I1 ratio=elastic net mixing parameter, C= inverse of regularization strength) of the elastic net model, second column shows the average weighted F-1 scores of the fitted model with the given hyperparameters using the above described evaluation method.

Henceforth the best former parameter setting were was used based on the maximum averaged F-1 score reached:

- 0.5 as elastic-net mixing parameter
- 0.01 as inverse regularization strength which means “half-way between lasso and ridge penalty” and quite strong regularization

We standardized the features because introducing regularization term make it a scale-variant model. According to Supplementary Table 2 the model performs well on unseen drug combinations. Using the “leave combinations out” cross- validation scheme we get a more realistic picture of the model coefficients. By inspecting the coefficients, we can identify the relevant features and their impact.

| <i>10 fold “new drug combination” cross validation</i> | <b>Train mean</b> | <b>Train STD</b> | <b>Test mean</b> | <b>Test STD</b> |
|--------------------------------------------------------|-------------------|------------------|------------------|-----------------|
| <b>Balanced accuracy</b>                               | <b>83,1%</b>      | <b>0.4%</b>      | <b>77.35%</b>    | <b>1.96%</b>    |
| <b>Matthews correlation coefficient</b>                | <b>69.24%</b>     | <b>0.6%</b>      | <b>59%</b>       | <b>3.2%</b>     |

**Supplementary Table 2.**

**Classification result of logistic regression model with elastic net.**

The table shows the evaluation of the best- performing model using the “leave combinations out” cross- validation scheme measured by various classification metrics (balanced accuracy, Matthews correlation coefficient).

## Identification of differences between correctly and wrongly predicted synergies based on monotherapeutic features

### Input features:

- Modelling feasibility (Supplementary Data 1)
- Fold accuracy (considering DREAM *in vitro* results as the gold standard) (Supplementary Data 1)
- Number of targets included and not included in the signaling network with various threshold values (100, 1000, 10000 nmol)
- Two kinds of *in silico* mechanism of action (MoA) categories (Supplementary Data 1)
- Cell line coverage of the different drugs (Supplementary Data 1)
- Number of common targets included in the signaling network
- Number of common targets in total

### Target feature:

- Correctness of our prediction (compared to the DREAM *in vitro* synergy data)  
Correctness was quantified based on thresholded DREAM *in vitro* synergy scores and our Bliss IC50 maxes (IV threshold: 30, IS threshold: 30) (Fig. 4B)
- Using these thresholds, we got around 66 % balanced accuracy and the below confusion matrix (Supplementary Table 3)

| Labels                 | Predicted Synergistic | Predicted Non-Synergistic |
|------------------------|-----------------------|---------------------------|
| Actual Synergistic     | TP = 56               | FN = 72                   |
| Actual Non-Synergistic | FP = 138              | TN = 711                  |

**Supplementary Table 3.**

**Confusion matrix of predictions taking DREAM results as true labels.**

TP – True positive, TN-True negative, FP – False positive, FN – False negative

Since we cannot observe any input feature correlating with our target feature nor any meaningful

differences between the classes of input features by visual inspection, we fitted linear and non-linear models to classify our prediction categories. We experimented with all confusion matrix elements (TP, TN, FP, FN) and binarized categories as well (Correctly-Not correctly predicted). Even with handling class imbalances, these models were not satisfying as TN samples over-dominated all classifiers. The exclusion of TN samples from the data caused significant performance improvement (Supplementary Table 4). These TN samples couldn't be separated by using our independent variables.

| <i>10-fold cross validation scores with RF</i> | <b>Mean balanced accuracy</b> | <b>Std of balanced accuracy</b> |
|------------------------------------------------|-------------------------------|---------------------------------|
| <b>Inclusion of TN samples</b>                 | 55.37 %                       | 8.3 %                           |
| <b>Exclusion of TN samples</b>                 | 66.09 %                       | 3.53 %                          |

**Supplementary Table 4.**

**Balanced accuracy including-excluding TN samples.**

Mean and standard deviation of balanced accuracies evaluated using 10-fold cross-validation with vs without true negative samples.

To identify only the relevant features, we applied Recursive Feature Elimination to discard irrelevant input features. As we can inspect, including other features besides the 4 most relevant features doesn't really increase our performance metrics (Supplementary Figure 11). Therefore, we continued modelling by excluding the least important features (feasibility and MoA category labels) and used the top 9 features and hyperparameter optimized a Random Forest model (Supplementary Table 5).

| <i>10-fold cross validation scores with RF</i>    | <b>Mean balanced accuracy</b> | <b>Std of balanced accuracy</b> | <b>Mean weighted F-1 score</b> | <b>Std of weighted F-1 score</b> |
|---------------------------------------------------|-------------------------------|---------------------------------|--------------------------------|----------------------------------|
| <b>Without hyperparam opt</b>                     | 69.51 %                       | 7.872 %                         | 68.92 %                        | 5.01 %                           |
| <b>With hyperparam opt</b>                        | 73.47 %                       | 13.56 %                         | 74.25 %                        | 11.64 %                          |
| <b>With optimized hyperparam and oversampling</b> | 76.68 %                       | 4.8 %                           | 76.46 %                        | 4.55 %                           |

**Supplementary Table 5.  
Hyperparameter optimization and oversampling results.**

The columns denote the various classification metrics used for evaluation, while the rows are models with different conditions.

According to the gini index based feature importance values of the optimized Random Forest (RF) model, fold accuracies, cell line coverage, and the number of common targets seems to be important as well for the model (Supplementary Figure 9 and Supplementary Table 6).

| <b>TOP relevant features in decreasing order</b> |
|--------------------------------------------------|
| Drug A fold accuracy                             |
| Drug B fold accuracy                             |
| Cell line coverage                               |
| Drug B MoA label                                 |

**Supplementary Table 6.  
The most relevant features based on RFE.**

The table includes the 4 most relevant features in decreasing order based on Recursive Feature Elimination with a random forest model evaluated by cross-validation. Other features were

eliminated due to their marginal/non-existent contributions to model performance.

In order to further investigate how these features impact our target feature, the correctness of our predictions, the game theory based SHapley Additive exPlanations <sup>14</sup> was used. In order to simplify the interpretation of fold accuracy variables we took the absolute value of them. As we can inspect (Supplementary Figure 10), a low value of *cell\_line\_coverage* increased the probability of the wrong prediction category, while a high value of *cell\_line\_coverage* decreased the probability of the correct prediction category. Similarly, a low value of *drug\_b\_fold\_accuracy* increased the probability of the wrong prediction category, while a high value of *drug\_b\_fold\_accuracy* increased the probability of the correct prediction category



## **Supplementary Methods 4: Machine learning benchmark framework for validating the predictive performance of the Simulated Cell**

Creating an equitable benchmark framework required training models on cell line – drug – dose triplets to predict killrates as monotherapy responses. These models can be directly applied for combination synergy prediction, with the publicly available DREAM challenge dataset serving as a test set to evaluate prediction capabilities.

Our benchmark procedures are as follows:

- Leveraging monotherapy responses from the DREAM dataset, we derived dose-response curves based on provided summary metrics (IC50, Hill Parameter, maximal response).
- To delineate drugs' inhibitory effects on their targets, we identified targets from publicly available datasets, coupled with target-specific inhibitory constants, and calculated dose-dependent inhibition rates.
- Characterizing cell lines, we utilized the CCLE transcriptomics dataset, concatenated with drug target data, serving as inputs for the chosen machine learning methods. Essentially, this mirrors the dataset fed into the Simulated Cell network's input layer, allowing fair contrast between machine learning methods and our approach.

We followed the benchmark strategy outlined in the CellBox article\*, validating our model's predictive performance against state-of-the-art machine learning algorithms. Thus, employing appropriate featurization techniques, we evaluated whether our model-building efforts benefitted the drug response prediction. For the algorithmic benchmark, we utilized three machine learning models: linear Ridge regression, a fully-connected neural network, and a gradient-boosted model (LightGBM), considered broad enough for reliable performance evaluations.

Given the Simulated Cell was manually calibrated primarily on publicly available monotherapy responses and only in limited cases on monotherapy from the DREAM dataset, and was not using the combination data from the DREAM dataset, we consider the DREAM dataset as a suitable test set for predictions. For the machine learning-based benchmark, we trained models on monotherapy dose-response curve data, conducting ten random train-test splits. Three splitting strategies were employed for evaluation along the cell line, the drug, and the cell line-drug dimensions together.

Performance metrics for the Simulated Cell predictions were obtained by calculating metrics for each test set created for machine learning methods. For the dose-response curves were fitted on predictions to assess the *in silico* IC50 scores. Pearson correlation was applied to compare the *in vitro* and *in silico* IC50 scores. Bliss synergy score was calculated based on Bliss independence principle, to evaluate the accuracy of the Simulated Cell and the competing ML method's prediction performance, balanced accuracy was calculated.

The benchmarking method above is applicable to model version 4 of the Simulated Cell, released in 2019 Q3.

\* Yuan, Bo et al. "CellBox: Interpretable Machine Learning for Perturbation Biology with Application to the Design of Cancer Combination Therapy." *Cell systems* vol. 12,2 (2021): 128-140.e4. doi:10.1016/j.cels.2020.11.013)

# Supplementary Figures

## Supplementary Figure 3: Comparison of *in vitro* dose responses from different sources across the DREAM challenge cell line set

Setting up the correct drug response within each cell line and drug pair is one of the most challenging but crucial parts to prepare the *in silico* Simulated Cell for applying adequate prediction methods. Since most databases contain one datapoint for each measurement, it is hard to draw conclusions from mismatching *in silico* and *in vitro* responses. Hence, a tradeoff had to be made between the correct drug response prediction based on a single datapoint and accurate underlying biology, especially where protocols, such as treatment times differ. The plot demonstrates nicely the differences between *in vitro* IC50 data from various external sources (showed shown in red color) and DREAM *in vitro* data where it was available (showed shown in turquoise color). Calibration focused on using the other, non-DREAM sources as primary endpoints due to their abundance.

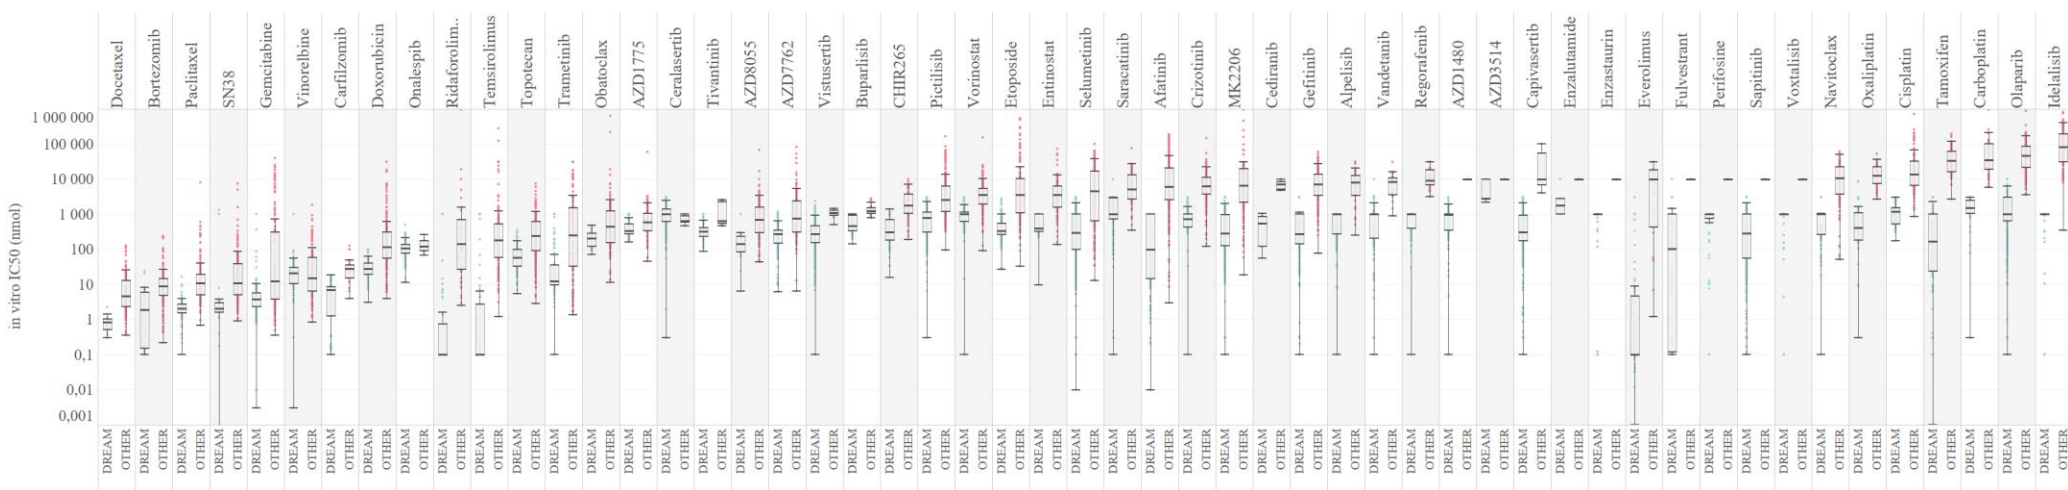

## Supplementary Figure 4: ROC curves of monotherapy simulations for compounds targeting DDR or non-DDR MoA categories

Results were aggregated based on the targeted MoA category of compounds, resulting in DDR and non-DDR groups. AUC metric is indicated. Monotherapy *in silico* IC50s are compared to the non-DREAM, other IC50 *in vitro* values as primary endpoints during the manual calibration process.

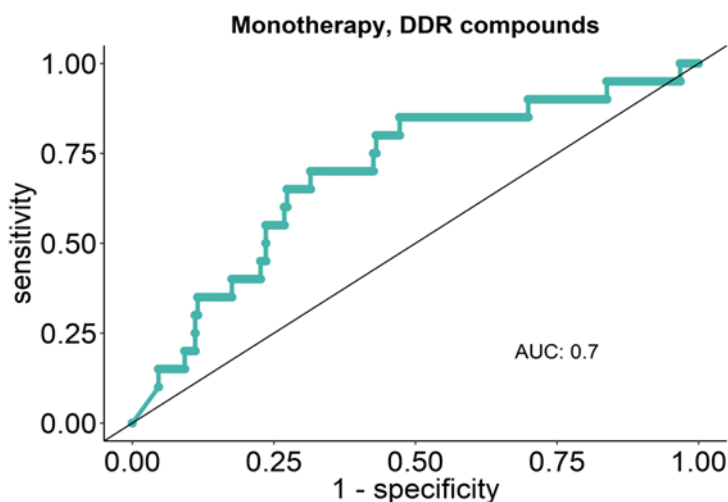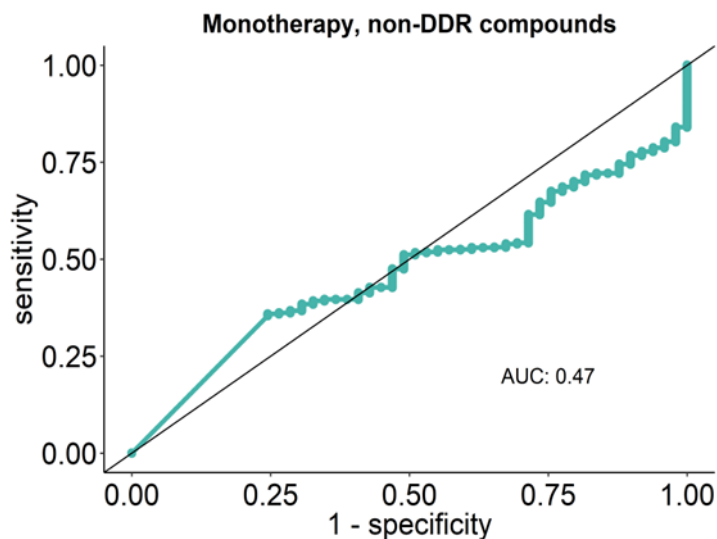

## Supplementary Figure 5: Examples of different combination grid quality categories

Each dose grid represents normalized survival values in each dose points. A) Unreliable combination: possible false positive synergy scores due to non-monotone dose response with both compounds under their IC<sub>50</sub>. 0.17% of all combinations were considered to fit into this category. B) Uncertain combination: possible false positive synergy scores due to non-monotone dose response with both compounds over their IC<sub>50</sub>. 5.43 % of all combinations were distinguished as uncertain combinations. C) Reliable combination: synergy score is considered reliable based on the preliminary quality check of the survival score landscape on the specific cell-drug combination dose grids. 65.96% of the combination were labelled as reliable based on the combination grids. The remaining 28.43% were considered to be not-synergistic, since one of the combination partner's effects dominated the observed effect, and the other partner did not have the space for showing an effect on survival, example not shown. Abbreviations: AZ\_AKT: AKT inhibitor, AZ\_PRKDC\_I: PRKDC inhibitor 1, AZ\_PRKDC\_II: PRKDC inhibitor 2, AZ\_PI3K- Protein synthesis (PI3K) inhibitor (molecular target profiles were provided by AstraZeneca).

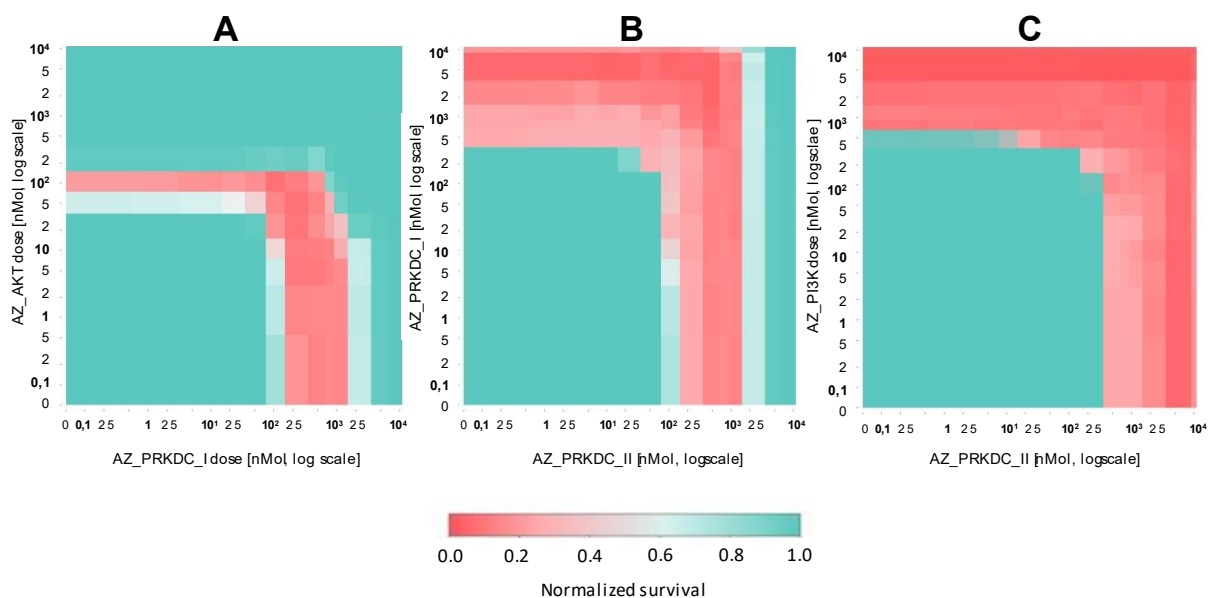

## Supplementary Figure 6: Discretization of synergy scores with K-means clustering

An algorithmic method was applied to discretize the continuous synergy scores. Thresholds for different synergistic categories were established using k-means clustering, a widely used discretization method in biological data analysis. Our assumption is that the distribution of synergy scores is the mixture of different synergy categories category distributions. After the evaluation of the clustering results, we draw two thresholds splitting the combination-cell line pairs into three distinct categories such as non-synergistic (Cluster 0), moderately synergistic (Cluster 2), and strongly synergistic (Cluster 1). For further evaluation, we prioritized the most promising, strongly synergistic pairs from Cluster 1.

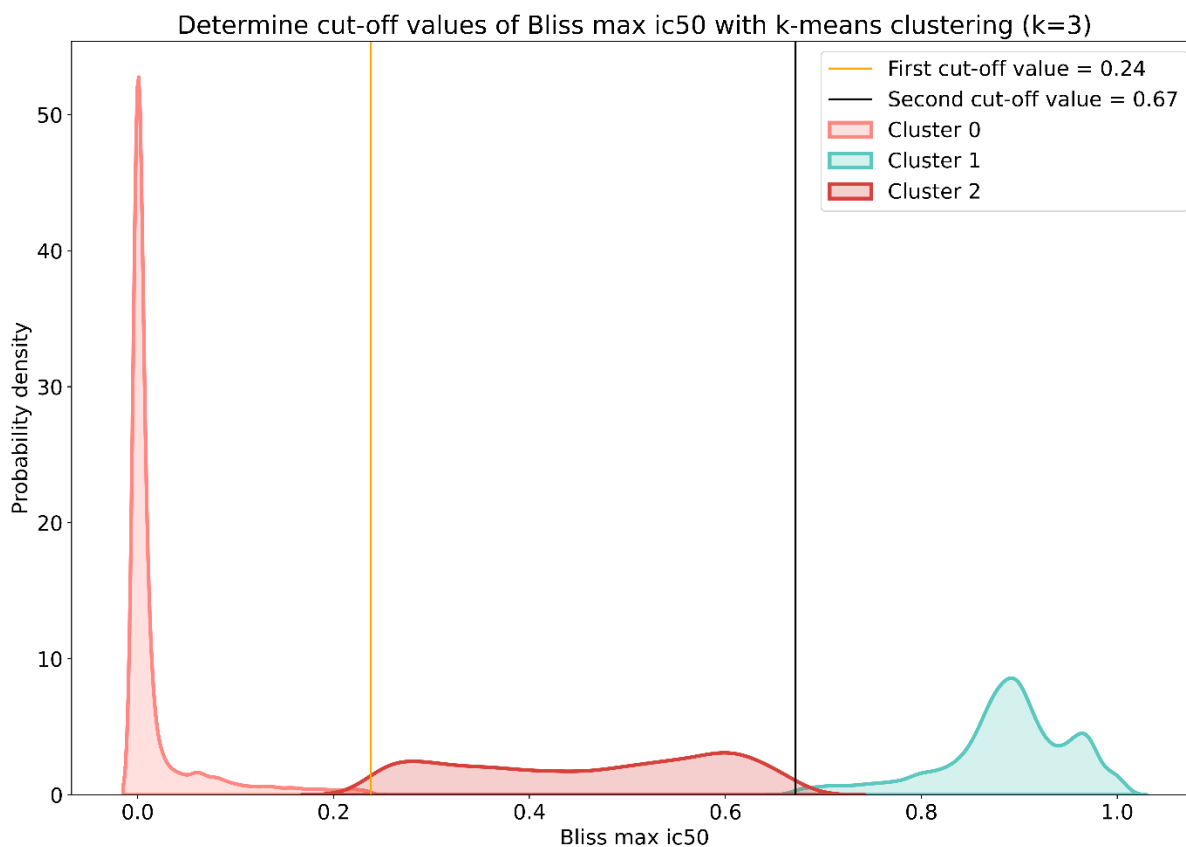

## Supplementary Figure 7: Grouped indication specific landscape of DDR:DDR combinations on combination modified killrates and overall synergy

The radar charts are representing different synergistic and non-synergistic combination pairs. Synergy is concluded from the average Bliss score with additional average killrate values. The higher the synergy is, the outer radius of the circle is reached at the given indication group. Mean synergy and mean killrate were calculated for each MoA groups for all cell lines categorized into indication groups.

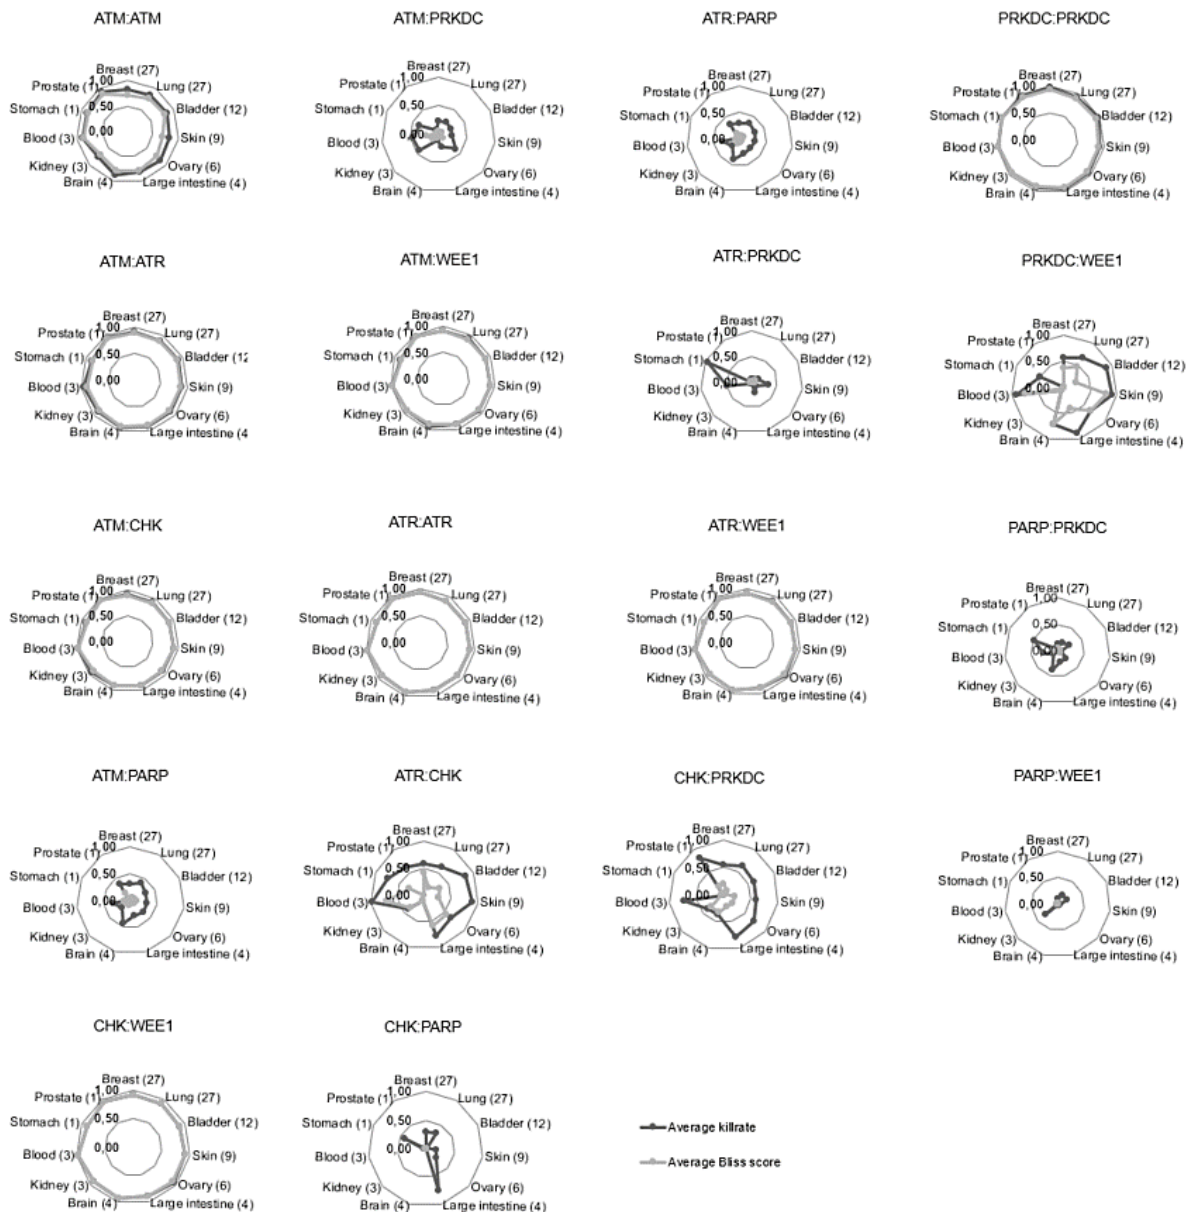

## Supplementary Figure 8: Performance analysis of combination synergy benchmark

A) Overall performance analysis of combination benchmark consisting of 977 overlapping datapoints with the DREAM challenge *in vitro* synergy scores. For the AUC evaluation *in vitro* (IV) threshold 30 and *in silico* threshold 20 were used. AUC metric and the amount of synergistic simulations (syn) are indicated.

A

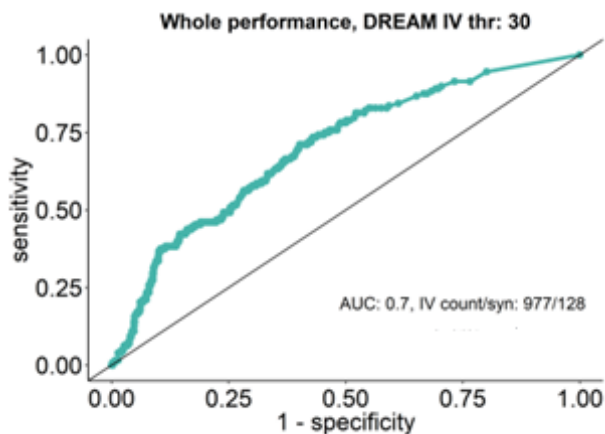

B) AUROC scores for the prioritized compounds based on the combination benchmark. The number of involved datapoints are indicated in parentheses. The *in vitro* threshold of 30 and *in silico* threshold of 20 were applied in the performance.

B

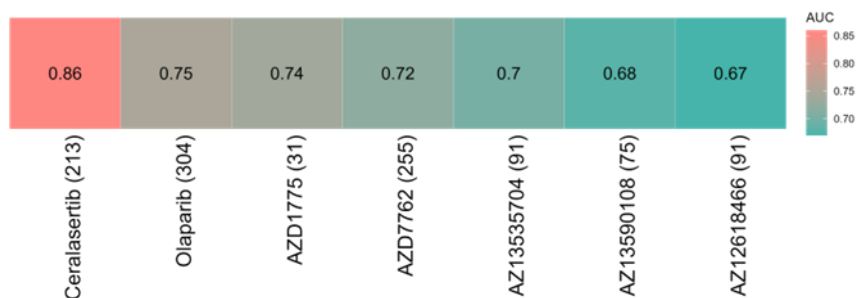



## Supplementary Figure 9: Tree-based feature importance of association between monotherapy related features and combination prediction accuracy with a Random Forest model

The examined features were: cell\_line\_coverage: coverage for the *in vitro* synergy of the combinations, drug\_b\_fold\_acc:  $\text{abs}(\log_{10}(\text{in silico IC}_{50}/\text{AZ in vitro IC}_{50}))$  for the second compound (DDRi or nonDDRi) of the combination, no\_of\_common\_targets\_insig: number of common targets of drug\_a and drug\_b in the signaling network, no\_of\_common\_targets: number of common targets of drug\_a and drug\_b, not only in the signaling network, drug\_a\_fold\_acc:  $\text{abs}(\log_{10}(\text{in silico IC}_{50}/\text{AZ in vitro IC}_{50}))$  for the first compound (DDRi) of the combination, drug\_a\_target\_num\_ratio and drug\_b\_target\_num\_ratio: ratio of the modelled targets, drug\_a\_MoA\_labels: MoA categories of the DDRi-s.

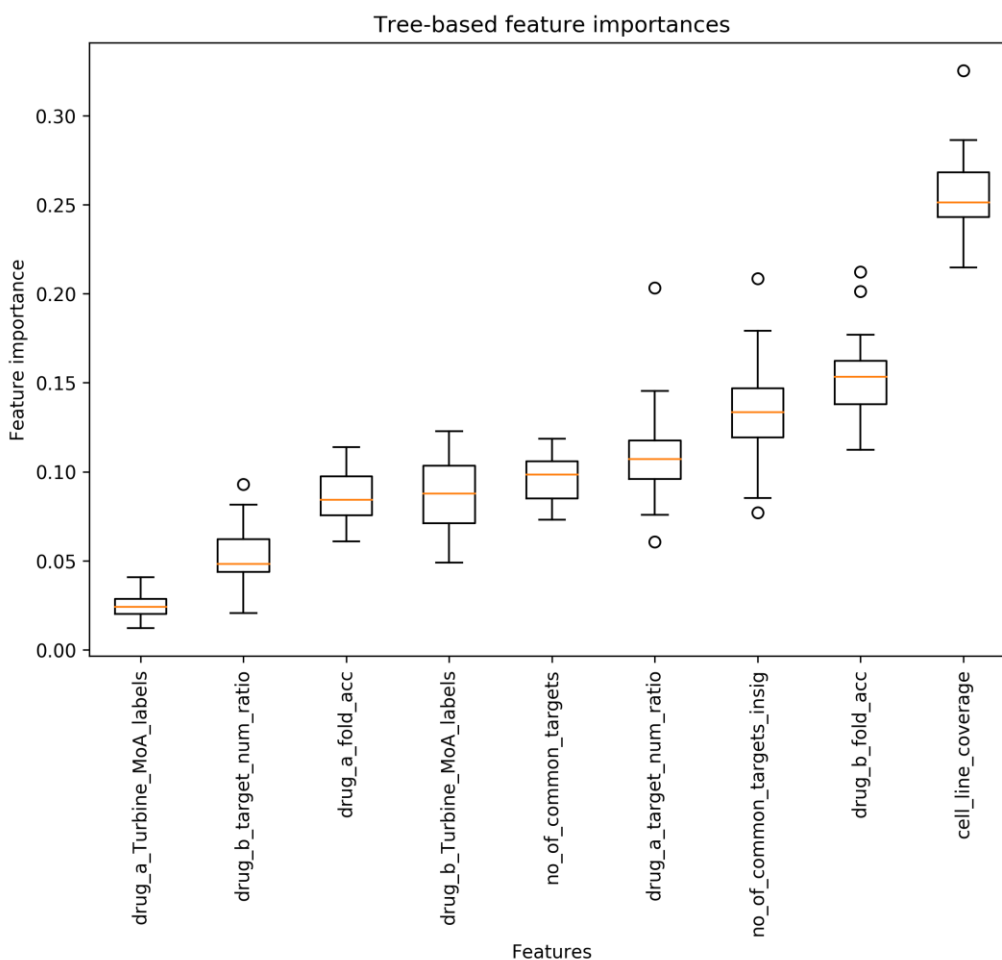

## Supplementary Figure 10: Investigation of relevant features impacting synergy as a target feature using SHapley Additive exPlanations (SHAP)

SHAP values of A) wrong predictions (FP, FN) and B) correct synergy predictions (TP). Game theory- based SHapley Additive exPlanations<sup>14</sup> was used to further investigate the relationship between the features and the model. We can plot the SHAP values of every feature for every sample. The plot sorts features by the sum of SHAP value magnitudes over all samples, and uses SHAP values to show the distribution of the impacts each feature has on the model output. The features used here were “fold accuracy” for each drugs that indicates the magnitude of difference between *in silico* and *in vitro* data, “MoA labels” for each drugs which annotates the mechanism of each drugs into Mechanism of Action groups, the “cell line coverage” which counts the number of cell lines for one combination therapy we had data for, “no common targets” and “no common targets insig” counts the number of targets shared between the two drugs of a given combination all together and with those targets that are present in our network only, respectively, and finally the “target num ratio” as the percentage of given drug’s target proteins are present in our network in a dose- dependent manner, where off-targets are counted as well. The color indicates the feature value with red for higher and blue for lower values.

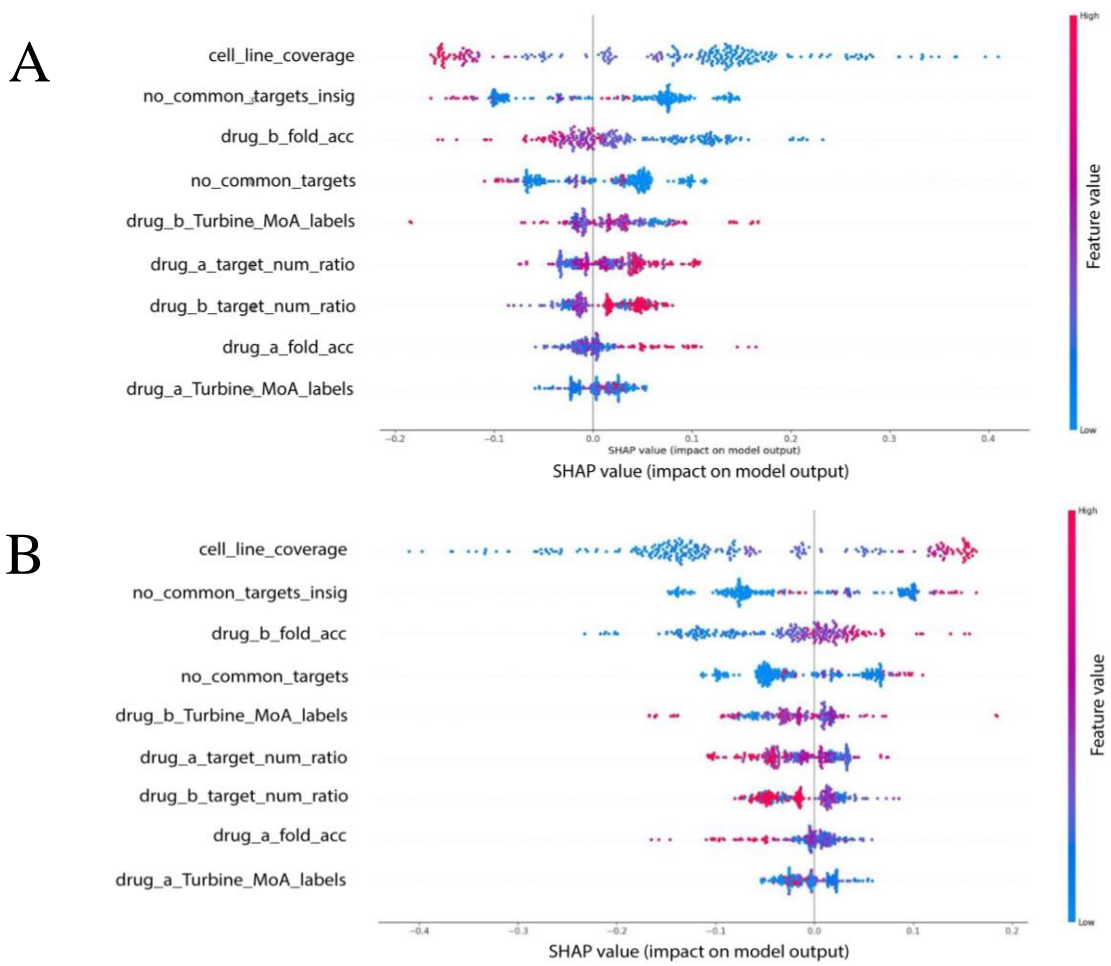

## Supplementary Figure 11: Determining features of predicting combination synergy and their positive and negative coefficients from logistic regression model based on 10-fold leave drug combinations out cross-validation

The plots below show the top 20 variables with the largest and lowest odds ratios, respectively, to indicate the most relevant features and their relationship with the target in the logistic regression model. Abbreviations: `_comp` – given node is targeted by the given combination, `drug_a_modelling_feasibility` – pathway readiness of the pathway in the signaling network targeted by Drug A, `drug_b_modelling_feasibility` - pathway readiness of the pathway in the signaling network targeted by Drug B. `10000_target_non_insig` - Number of drug targets not included in the signaling network above a binding affinity threshold of 10000 nmol in the molecular target data profile.

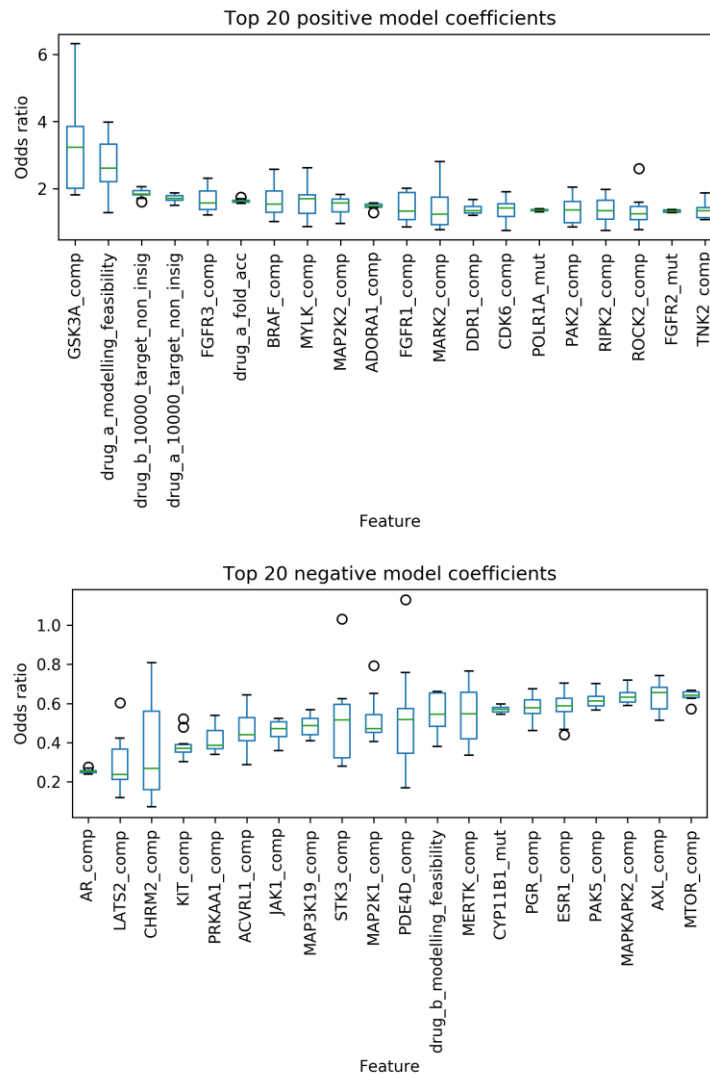

## Supplementary Figure 12: Comparison of the monotherapy response and combination synergy prediction performance of the Simulated Cell and machine learning models in case of different train-test splits

### A) *In silico-in vitro* IC50 correlation of the Simulated Cell and other *in silico* benchmark methods.

Based on the IC50 mean Pearson correlations, the Simulated Cell was not advantageous in a drug exclusive (DEX) setup compared to the Neural Network or the Linear regression model, while in cell line exclusive (CEX) and the combined all exclusive (AEX) train-test splits the correlation is better than the benchmark ML models. Dashed line of the boxes represents the mean Pearson correlation and standard deviation, while the continuous line is for median correlation values per model. For easier interpretation a table format is also created containing the exact core values.

### B) *In vitro-in silico* balanced accuracy scores of each *in silico* method to express synergy the predicting performance.

According to the yielded balanced accuracy scores per model, the Simulated Cell had an advantage in predicting correctly whether a drug combination was synergistic or not. The dashed vertical line represents the random level of balanced accuracy for easier understanding.

Details about the benchmark pipeline can be found in Supplementary Methods 4.

A

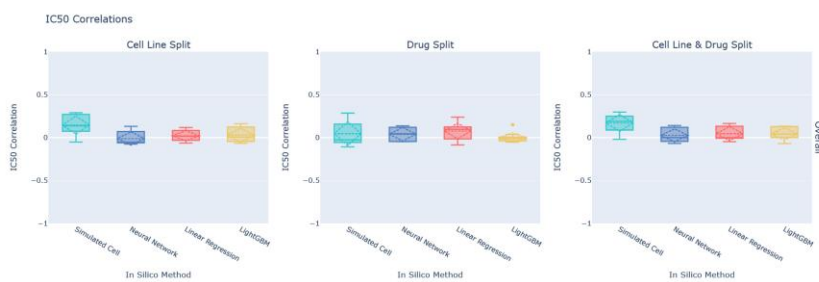

| Model            | Train-Test split |       |        |          |       |       |       |          |        |       |       |          |       |
|------------------|------------------|-------|--------|----------|-------|-------|-------|----------|--------|-------|-------|----------|-------|
|                  | CEX              |       |        |          | DEX   |       |       |          | AEX    |       |       |          |       |
|                  | SC               | NN    | LR     | LightGBM | SC    | NN    | LR    | LightGBM | SC     | NN    | LR    | LightGBM |       |
| IC50 correlation | Mean             | 0,145 | -0,011 | 0,021    | 0,028 | 0,046 | 0,039 | 0,077    | -0,002 | 0,170 | 0,026 | 0,046    | 0,041 |
|                  | SD               | 0,106 | 0,077  | 0,059    | 0,082 | 0,138 | 0,078 | 0,089    | 0,056  | 0,098 | 0,074 | 0,081    | 0,071 |

B

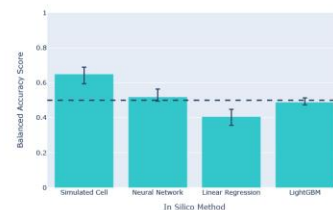

The benchmarking method above is applicable to model version 4 of the Simulated Cell, released in 2019 Q3.

## Supplementary Data

### Supplementary Data 1: *In silico* vs *in vitro* monotherapy measurements with respective cell line and compound annotation

This supplementary file contains the *in silico* IC50 prediction in nmol as in “IS (nmol)” column for each drug – cell line pairs, annotated in “ID”, “Cell line” and “Drug” columns. To have an experimental checkpoint for each prediction, we used the DREAM data where it was accessible or other open sources of *in vitro* measurements in nmol, stored in “IV DREAM (nmol)” and “IV OTHER (nmol)” columns, respectively. We also listed the one-fold accurate and inaccurate *in silico* predictions compared to their *in vitro* counterpart for both DREAM only and “Other” miscellaneous sources. Other databases are described in Supplementary Methods 3. To avoid cell line characterization issues, each cell line used in our screens is annotated with their metastatic status as in “Cell line origin”, the source organ as in “Organ of origin”, referred disease, MSI status, and the adequate *in vitro* maintaining setting as in “Growth properties”. For the compound annotation, we found it important to clarify the putative target and their respective targeted mechanism of action group, the feasibility score based on our internal benchmarking system, and the cell line coverage we have data for each drug listed.

### Supplementary Data 2: Combination measurement metrics

This supplementary file contains each drug combination with all cell lines screened, i) the *in silico* IC50 value of each combination drug as monotherapy in given cell line (with values over 10,000 entered as 10,000), ii) the killrate value when the combination therapy was applied in given cell line at maximum Bliss synergy dose, iii) the maximum Bliss synergy score of the combination in given cell line and iv) the same with both compounds under the IC50 dose, and v) classification determining reliability of the combination's effect in given cell line.

### Supplementary Data 3: Monotherapy biomarkers

To distinguish those biomarkers, which could modify the effect of the each drug alone from the combination specific ones, we screened for monotherapy biomarkers. Supplementary Data 3 contains every potential biomarker we predicted for each drug individually. Affected cell lines and their source of origin are stored as in “Cell line” and “Organ of origin”. Our predictions are coded as the gene and the effect of the mutation on a given protein being loss-of-function (genename:0.0), gain-of-function (genename:1.0), underexpression (genename:mc0.3), or overexpression (genename:mc5.0) as in “Hypothesis” and “Hypothesis alteration”. To ease the matching to different outer sources we listed the UniProt ID's of affected proteins as in “Hypothesis uniprot” and for easier search, we also listed the gene name only from the hypothesis as in “Hypothesis genename”.

## **Supplementary Data 4: Combination biomarkers for PARPi:ATMi along with PRKDCi:NFKBi**

Contains what we predicted as unique biomarkers for the combination therapy of PARP and ATM inhibitors and the combination of PRKDC and NFKB inhibitors for a given cell line. Our predictions are coded as the gene and the effect of the mutation on a given protein being loss-of-function (genename:0.0), gain-of-function (genename:1.0), underexpression (genename:mc0.3), or overexpression (genename:mc5.0) as in “Hypothesis” and for easier search we also listed the gene name only from the hypothesis as in “Hypothesis genename”. This data file also contains: i) the killrate of the Simulated Cell without any treatment and with or without added alteration;, ii) the maximum Bliss synergy score of the combination in the given cell line and the same with both compounds under the IC50 dose;, iii) the *in silico* IC50 value of each combination drug as monotherapy in given cell line (with values over 10,000 entered as 10,000) and either with or without added alteration;, iv) the magnitude of the shift in IC50 for either drug by the hypothesis;, v) sum of the Bliss difference matrix, which is the result of element-wise subtraction of non-altered cell line’s Bliss matrix from the altered cell line’s Bliss matrix;, vi) sum of the killrate difference matrix, which is the result of element-wise subtraction of non-altered cell line’s killrate matrix from the altered cell line’s killrate matrix;, and vii) the type of biomarker (sensitivity / resistance biomarker) based on overall\_killrate\_change.

## **Supplementary Data 5: The estimated patient population size for Olaparib:ATMi combination and the prevalence of the significantly strong synergy shifter biomarkers specific for the combination**

To provide translatable combination specific biomarkers, we estimated the size of the potential patient population who could benefit from the Olaparib:ATMi combination by calculating the frequency of patients with damaging BRCA1 or BRCA2 and ATM mutations, since these genetic factors are one of the main inclusion criteria for Olaparib and ATMi monotherapy.

**S5A:** Contains the number and frequency of patients with damaging BRCA1 or BRCA2 and ATM mutations in the indicated 30 PanCancer TCGA projects. To estimate the size of the benefiting patient population from this combination, we also involved cancer- type prevalence data from the NCI Surveillance, Epidemiology, and End Results Program by using the SEER explorer application. 109 out of 10141 (1.075%) patients met these conditions involved in 30 PanCancer TCGA studies. Our estimation indicates that more than 120,000 patients with various tumor types could benefit from Olaparib therapy combined with ATM inhibitors.

**S5B1:** Contains the number and frequency of patients bearing damaging mutations of the indicated genes in patients with the same tumor types, which we examined in *in silico* screens through cell

lines. Mutational combination specific biomarkers were represented with low frequency across all indications that we investigated during *in silico* screens. Functional alterations of TP53BP1 were the most frequent in patients with cutaneous melanoma and colorectal cancers (6.,3% and 3.,7%, respectively), DDB1 functional alteration was also observed in melanoma and gastric cancer samples with ~2% frequency, while alterations of CUL4A were the most occurrent in melanoma patients. Mutational frequency distribution was determined by using the TCGA dataset. The extended mutational data was obtained from cBioPortal for each prioritized tumor types. The damaging status of the mutations was extracted from the PolyPhen feature. The final frequency table indicates the number of damaging mutations at combination biomarker and TCGA tumor type levels.

**S5B2:** Contains the number and frequency of patients, who express the given genes differently compared to the mean expression of total patients involved in TCGA studies. Like S5B1, we analyzed only those studies' data, which represents tumor types we modelled during *in silico* screenings by cell lines. Using gene expression z-score data from cBioPortal we examined the gene expression distributions of the potential expression biomarkers for each prioritized TCGA tumor types. For this, the *data\_RNA\_Seq\_v2\_mRNA\_median\_all\_sample\_Zscores* data was used which profiles the log-transformed mRNA expression z-scores compared to the expression distribution of all samples. In each tumor type we kept patients where the z-score absolute value was higher than 2 and then quantified these cases in each prioritized tumor types. We detected RAD54B/L overexpression significantly decreasing synergy. Interestingly, underexpression of these genes were the most prevalent with 51-54% frequency in prostate adenocarcinoma, kidney renal clear cell (KIRC), and bladder carcinomas (BLCA). The underexpression of ATRIP was the most prevalent in KIRC (54%) and squamous cell lung carcinomas (50.,9%). KAT5 overexpression was observed in acute lymphoid leukemias (4%) and BLCA (3.,9%).

Column legends can be found in the corresponding data files. Abbreviations for TCGA projects for better understanding can be found here: <https://gdc.cancer.gov/resources-tcga-users/tcga-code-tables/tcga-study-abbreviations>

## Supplementary References

1. Chang, H. H. Y., Pannunzio, N. R., Adachi, N. & Lieber, M. R. Non-homologous DNA end joining and alternative pathways to double-strand break repair. *Nat Rev Mol Cell Biol* **18**, 495–506 (2017).
2. Mohiuddin, I. S. & Kang, M. H. DNA-PK as an Emerging Therapeutic Target in Cancer. *Front Oncol* **9**, 635 (2019).
3. Ghonim, M. A. *et al.* DNA-dependent protein kinase inhibition blocks asthma in mice and modulates human endothelial and CD4<sup>+</sup> T-cell function without causing severe combined immunodeficiency. *Journal of Allergy and Clinical Immunology* **135**, 425–440 (2015).
4. Colotta, F., Allavena, P., Sica, A., Garlanda, C. & Mantovani, A. Cancer-related inflammation, the seventh hallmark of cancer: links to genetic instability. *Carcinogenesis* **30**, 1073–81 (2009).
5. Grivennikov, S. I., Greten, F. R. & Karin, M. Immunity, inflammation, and cancer. *Cell* **140**, 883–99 (2010).
6. Yu, H., Kortylewski, M. & Pardoll, D. Crosstalk between cancer and immune cells: role of STAT3 in the tumour microenvironment. *Nat Rev Immunol* **7**, 41–51 (2007).
7. Chaudhary, P. M., Eby, M. T., Jasmin, A. & Hood, L. Activation of the c-Jun N-terminal kinase/stress-activated protein kinase pathway by overexpression of caspase-8 and its homologs. *J Biol Chem* **274**, 19211–9 (1999).
8. Huynh, J., Chand, A., Gough, D. & Ernst, M. Therapeutically exploiting STAT3 activity in cancer - using tissue repair as a road map. *Nat Rev Cancer* **19**, 82–96 (2019).
9. Janssens, V. & Goris, J. Protein phosphatase 2A: a highly regulated family of serine/threonine phosphatases implicated in cell growth and signalling. *Biochem J* **353**, 417–39 (2001).
10. Watkins, G. R. *et al.* Monoubiquitination promotes calpain cleavage of the protein phosphatase 2A (PP2A) regulatory subunit  $\alpha 4$ , altering PP2A stability and microtubule-associated protein phosphorylation. *J Biol Chem* **287**, 24207–15 (2012).
11. van de Wetering, M. *et al.* The beta-catenin/TCF-4 complex imposes a crypt progenitor phenotype on colorectal cancer cells. *Cell* **111**, 241–50 (2002).
12. Gallo, C. A., Cecchini, R. L., Carballido, J. A., Micheletto, S. & Ponzoni, I. Discretization of gene expression data revised. *Brief Bioinform* **17**, 758–770 (2016).
13. Preuer, K. *et al.* DeepSynergy: predicting anti-cancer drug synergy with Deep Learning. *Bioinformatics* **34**, (2018).
14. Lundberg, S. M. A unified approach to interpreting model predictions. in *In Proceedings of the 31st International Conference on Neural Information Processing Systems (NIPS'17)* 4768–4777 (2017).
